# Supplementary material
Source: PubMed Central journal article supplement (PMC2949406)

**Associations of PM<sub>10</sub> with Sleep and Sleep-Disordered Breathing in Adults**

**from Seven U.S. Urban Areas**

Antonella Zanobetti, Susan Redline, Joel Schwartz, Dennis Rosen, Sanjay Patel,  
George T O'Connor, Michael Lebowitz, Brent A Coull, Diane R Gold

**Online Data Supplement**

Online Supplement

Figure 1. Season- and city-specific percent change in Respiratory Disturbance Index, for an interquartile increase in short term PM<sub>10</sub>, adjusting for long term PM<sub>10</sub>.

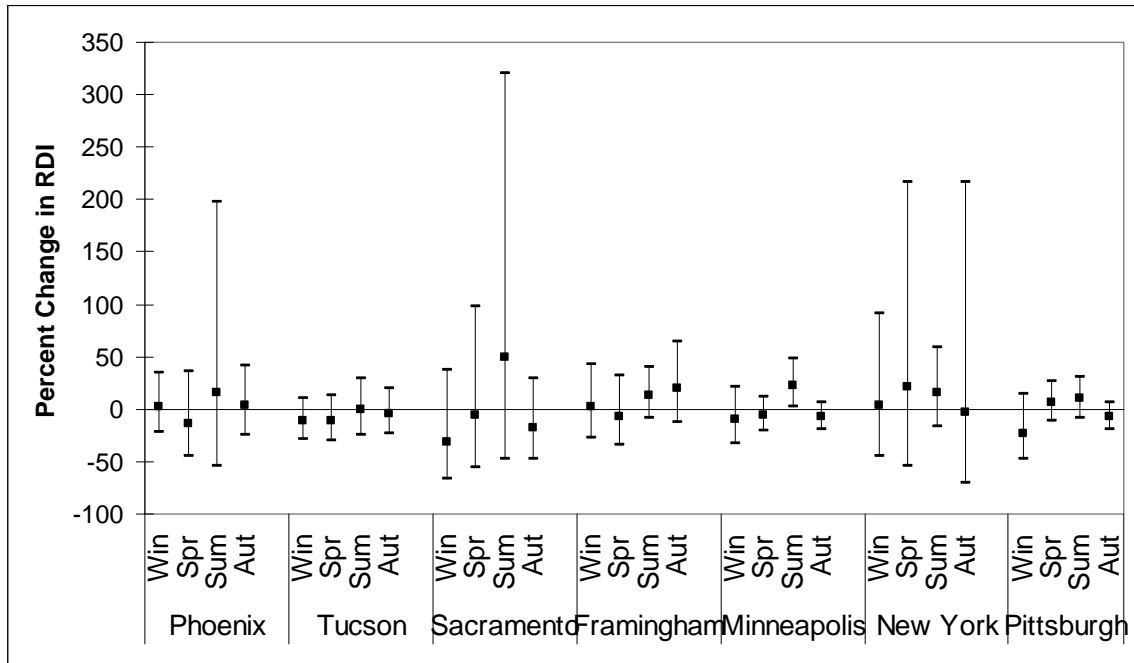

Supplement: supp_182_6_819__1.pdf [file supp_182_6_819__1.pdf]
